# Supplementary material
Source: Springer Nature journal article supplement (https://www.springermedizin.de/resource/supplementary/12950_2010_171_MOESM3_ESM.pdf/9558116)

**A**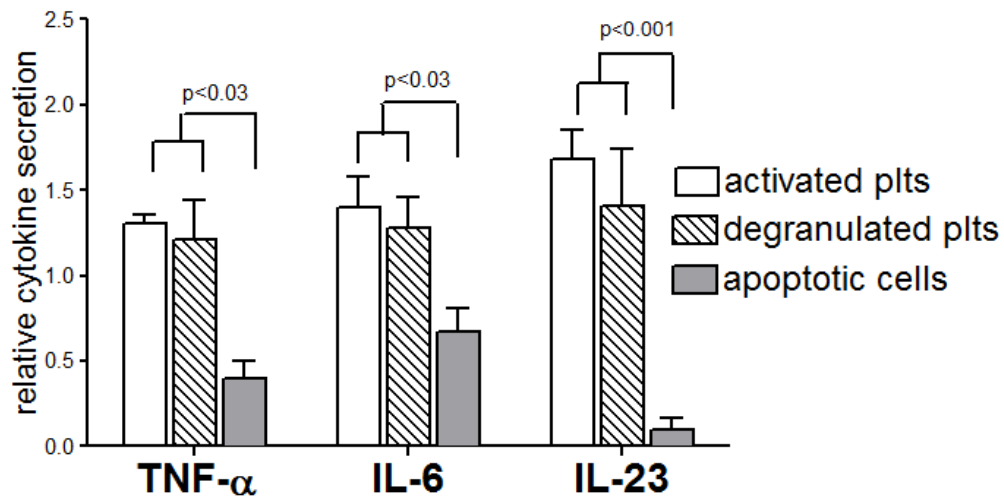**B**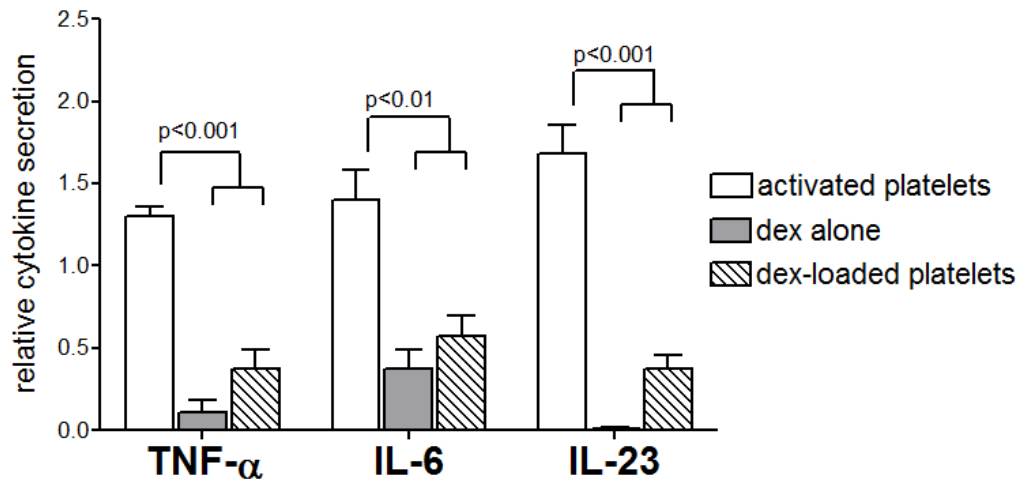

Supplement: MOESM3 [file 9558116]
